# Supplementary material
Source: PubMed Central journal article supplement (PMC4361305)
Supplement: NIHMS650644-supplement-supplement_1.pdf [file NIHMS650644-supplement-supplement_1.pdf]

**Supplemental Table 1:  
Correlation of Grade of Anaplasia and Degree of Optic Nerve Invasion in 266 Patients with Retinoblastoma**

| <b><i>Frequency<br/>Row Percent</i></b> | <b>Absent<br/>Invasion</b> | <b>Pre-laminar<br/>Invasion</b> | <b>Laminar<br/>Invasion</b> | <b>Post-Laminar<br/>Invasion</b> | <b>Surgical Margin<br/>Invasion</b> | <b>TOTAL</b> |
|-----------------------------------------|----------------------------|---------------------------------|-----------------------------|----------------------------------|-------------------------------------|--------------|
| <b>Mild<br/>Anaplasia</b>               | 23<br>79.31                | 1<br>3.45                       | 1<br>3.45                   | 4<br>13.79                       | 0<br>0.00                           | 29           |
| <b>Moderate<br/>Anaplasia</b>           | 83<br>48.54                | 50<br>29.24                     | 21<br>12.28                 | 13<br>7.60                       | 4<br>2.34                           | 171          |
| <b>Severe<br/>Anaplasia</b>             | 12<br>18.18                | 15<br>22.73                     | 12<br>18.18                 | 19<br>28.79                      | 8<br>12.12                          | 66           |
| <b>TOTAL</b>                            | 118                        | 66                              | 34                          | 36                               | 12                                  | 266          |

**Fisher's Exact Test: P = 1.078E-09**

**Supplemental Table 2.**  
**Correlation of Grade of Anaplasia and Degree of Choroidal Invasion in 266 Patients with Retinoblastoma**

| <b><i>Frequency<br/>Row Percent</i></b> | <b>Absent Invasion</b> | <b>Non-massive Invasion</b> | <b>Massive Invasion</b> | <b>TOTAL</b> |
|-----------------------------------------|------------------------|-----------------------------|-------------------------|--------------|
| <b>Mild Anaplasia</b>                   | 28<br>96.55            | 0<br>0.00                   | 1<br>3.45               | 29           |
| <b>Moderate Anaplasia</b>               | 145<br>84.80           | 11<br>6.43                  | 15<br>8.77              | 171          |
| <b>Severe Anaplasia</b>                 | 28<br>42.42            | 14<br>21.21                 | 24<br>36.36             | 6            |
| <b>TOTAL</b>                            | 201                    | 25                          | 40                      | 266          |

**Fisher's Exact Test P = 1.788E-10**

**Supplemental Table 3.**  
**Correlation of Grade of Anaplasia and Anterior Chamber Invasion in 266 Patients with Retinoblastoma**

| <b><i>Frequency<br/>Row Percent</i></b> | <b>Absent Invasion</b> | <b>Present Invasion</b> | <b>TOTAL</b> |
|-----------------------------------------|------------------------|-------------------------|--------------|
| <b>Mild Anaplasia</b>                   | 26<br>89.66            | 3<br>10.34              | 32           |
| <b>Moderate Anaplasia</b>               | 164<br>95.91           | 7<br>4.09               | 164          |
| <b>Severe Anaplasia</b>                 | 58<br>87.88            | 8<br>12.12              | 70           |
| <b>TOTAL</b>                            | 248                    | 18                      | 266          |

**Fisher's Exact Test P=0.0383**

**Supplemental Table 4.****One-Way Analysis of Variance (ANOVA) and Multiple Comparison Test (MCT) Results for Nuclear Morphometric Analysis in 47 Cases of Retinoblastoma**

| <b>Feature<br/>(p value from ANOVA)</b> | <b>Significantly Different Groups<br/>(95% Confidence Interval from MCT)</b>                                                                                                                                                                |
|-----------------------------------------|---------------------------------------------------------------------------------------------------------------------------------------------------------------------------------------------------------------------------------------------|
| Area<br>(p = 3.328163e-06)              | Retinocytoma and Severe: (-543.696595, -130.284425)<br>Mild and Moderate: (455.792538, -68.434728)<br>Mild and Severe: (-596.197045, -215.537569)                                                                                           |
| Perimeter<br>(p = 1.223930e-08)         | Retinocytoma and Moderate: (-37.731521, -3.273227)<br>Retinocytoma and Severe: (-52.555303, -18.604192)<br>Mild and Moderate: (-43.287318, -11.475897)<br>Mild and Severe: (-58.089644, -26.828318)                                         |
| Eccentricity<br>(p = 4.585668e-13)      | Retinocytoma and Moderate: (-0.101353, -0.020836)<br>Retinocytoma and Severe: (-0.173505, -0.094173)<br>Mild and Moderate: (-0.100753, -0.026421)<br>Mild and Severe: (-0.172855, -0.099807)<br>Moderate and Severe: (-0.108503, -0.036985) |
| Circularity<br>(p = 1.240615e-15)       | Retinocytoma and Moderate: (0.019950, 0.081561)<br>Retinocytoma and Severe: (0.089774, 0.150478)<br>Mild and Moderate: (0.027932, 0.084811)<br>Mild and Severe: (0.097795, 0.153690)<br>Moderate and Severe: (0.042008, 0.096734)           |
| Extent<br>(p = 2.423461e-13)            | Retinocytoma and Moderate: (0.002233, 0.032494)<br>Retinocytoma and Severe: (0.039707, 0.069522)<br>Mild and Severe: (0.035087, 0.062540)<br>Moderate and Severe: (0.023811, 0.050690)                                                      |
| IntensityMean<br>(p = 4.089759e-04)     | Retinocytoma and Mild: (5.055324, 40.937481)<br>Retinocytoma and Severe: (12.147360, 46.913736)                                                                                                                                             |
